1 **Don't throw out the sympatric species with the crater lake water:**  
2 **fine-scale investigation of introgression provides weak support for**  
3 **functional role of secondary gene flow in one of the clearest**  
4 **examples of sympatric speciation**

5

6

7 Emilie J. Richards<sup>1\*</sup>, Jelmer W. Poelstra<sup>1,2</sup>, and Christopher H. Martin<sup>1</sup>

8

9 <sup>1</sup>Biology Department, University of North Carolina at Chapel Hill, Chapel Hill, North Carolina,

10 United States of America

11 <sup>2</sup>Biology Department, Duke University, Durham, North Carolina, United States of America

12 \*corresponding author: [ejr@live.unc.edu](mailto:ejr@live.unc.edu)

13

14

15

16

17

18

19 Running title: No functional role for secondary gene flow in sympatric cichlid radiation

20 Key words: adaptive radiation, introgression, gene flow, sympatric speciation

21 Abstract: 232 words; Main text: 5,493 words; Figures: 7; Tables: 2

22

23 **Abstract**

24 Genomic data has revealed complex histories of colonization and repeated gene flow previously  
25 unrecognized in some of the most celebrated examples of sympatric speciation and radiation.  
26 However, much of the evidence for secondary gene flow into these radiations comes from  
27 genome-wide tests, which tells us little about how gene flow potentially influenced sympatric  
28 diversification. Here we investigated whole genomes of Barombi Mbo crater lake cichlids for  
29 fine-scale patterns of introgression between species with neighboring riverine cichlid  
30 populations. We did find evidence of secondary gene flow into the radiation scattered across <  
31 0.24% of the genome; however, the functional and genetic diversity in these regions paint no  
32 clear picture of how that variation could have contributed to the ecological and morphological  
33 diversity found in the lake. Our results suggest that either variation in novel genetic pathways  
34 introduced during secondary gene flow contributed to the radiation, or that secondary gene flow  
35 was predominantly neutral with respect to the diversification processes. We also found evidence  
36 for differential assortment of ancestral polymorphism found in riverine populations between  
37 sympatric sister species, suggesting the presence of a hybrid swarm in the past. While the history  
38 of gene flow and colonization appears to be more complicated than once thought, the lack of  
39 compelling evidence for secondary gene flow influencing diversification suggests that we should  
40 not yet rule out one of the most celebrated examples of sympatric speciation in nature.

41

42

43

44

45

## 46 **Introduction**

47 Sympatric speciation, the extreme endpoint on the speciation-with-gene-flow continuum, is  
48 traditionally defined as the evolution of reproductive isolation without the aid of geographic  
49 barriers (Coyne and Orr 2004). Sympatric speciation has fascinated evolutionary biologists since  
50 Darwin for its illustration of the power of complex interactions between natural and sexual  
51 selection to create new species. Despite intense searches, very few case studies have been able to  
52 meet the rigorous criteria for demonstrating sympatric speciation in nature (Coyne and Orr 2004;  
53 Bolnick and Fitzpatrick 2007). Even in some of the more convincing examples that do meet  
54 these criteria, genomic data have revealed more complex evolutionary histories of multiple  
55 colonizations and repeated gene flow than previously thought (Papadopoulos et al. 2011; The  
56 Heliconius Genome Consortium et al. 2012; Geiger et al. 2013; Alcaide et al. 2014; Igea et al.  
57 2015; Malinsky et al. 2015; Martin et al. 2015a; Kautt et al. 2016).

58         However, much of the support for complicated histories involving repeated gene flow  
59 events into radiations comes from genome-wide tests for gene flow (e.g. (Lamichhaney et al.  
60 2015; Martin et al. 2015a; Meier et al. 2017)). One prediction of models of speciation with gene  
61 flow is that divergence between incipient species should be heterogeneous across the genome  
62 (Turner et al. 2005; Harr 2006; Feder et al. 2012; Nosil and Feder 2012a,b). Indeed, high  
63 heterogeneity in genomic differentiation has been found across the genomes of many recent or  
64 incipient sister species (e.g. Jones et al. 2012; Martin et al. 2013; Poelstra et al. 2014; Soria-  
65 Carrasco et al. 2014; Malinsky et al. 2015; McGirr and Martin 2016), although other processes  
66 besides differential gene flow across the genome can produce similar heterogeneous patterns  
67 (Noor and Bennett 2009; Nachman and Payseur 2012; Cutter and Payseur 2013; Cruickshank  
68 and Hahn 2014; Guerrero and Hahn 2017; Ravinet et al. 2017). Only a handful of genes may

69 directly contribute to the speciation process whereas the rest of the genome is porous to gene  
70 flow while reproductive isolation is incomplete (Wu 2001; Wu and Ting 2004). Therefore, gene  
71 flow detected at the genome-wide level from populations outside the sympatric radiation does  
72 not by itself constitute evidence that secondary gene flow was involved in the divergence process  
73 among incipient species and shaped the radiation.

74 The Cameroon crater lake cichlid radiations are some of the most compelling cases for  
75 sympatric speciation in the wild (Coyne and Orr 2004). The most speciose of these radiations is  
76 found in the isolated 2.3 km-wide volcanic crater lake Barombi Mbo (Trewavas et al. 1972;  
77 Schliewen et al. 1994; Schliewen and Klee 2004). Barombi Mbo hosts a radiation of 11 endemic  
78 cichlid species, many of which have clear morphological and ecological separation from other  
79 sympatric species (Schliewen et al. 1994). Some endemics have evolved unique specializations,  
80 such as the spongivore *Pungu maclareni* and deep-water hypoxia specialist *Konia dikume*  
81 (Trewavas et al. 1972). Other endemics, such as *Stomatepia mariae* and *S. pindu*, appear to be  
82 incipient or stalled species complexes with only slight morphological and ecological divergence  
83 at the extremes of a unimodal distribution of phenotypes (Martin 2012). However, evidence of  
84 differential introgression, weak support for Barombi Mbo monophyly, and differences in levels  
85 of shared ancestry with outgroup riverine populations from genome-wide RAD-seq data suggest  
86 additional secondary gene flow into the radiation after the initial colonization, casting doubt on  
87 one of the best examples of sympatric speciation in the wild (Martin et al. 2015a).

88 Here we dissect those signals of repeated gene flow to investigate their role in the  
89 radiation using whole-genome sequences. We performed exhaustive searches for all genetic  
90 patterns consistent with secondary gene flow into the ancestral Barombi Mbo population or into  
91 subclades after their initial divergence using machine learning to finely dissect phylogenetic

92 signal across the genome and genomic scans to test for differential introgression. We find  
93 evidence of both shared introgression between sister species and across subclades in the radiation  
94 as well as differential introgression among sister species across small regions of the genome.  
95 However, functional and genetic diversity in these regions do not paint a clear picture of how  
96 introgressed variants may have contributed to speciation in these groups. Our results suggest that  
97 either 1) rare introgression of variants in novel genetic pathways contributed to the  
98 morphological and ecological diversity of the radiation (speciation with an allopatric phase), 2)  
99 secondary gene flow was predominantly or completely neutral and did not contribute to  
100 diversification in Barombi Mbo (sympatric speciation with gene flow), or 3) multiple  
101 colonizations of the lake before diversification brought in genetic variation that was then  
102 differentially sorted among incipient species (sympatric speciation from a hybrid swarm).

103

## 104 **Methods**

### 105 *Sampling and Genome Sequencing*

106 We sequenced whole genomes of 1-3 individuals from 10 out of the 11 species within the  
107 sympatric radiation of Oreochromini cichlids in Cameroon crater lake Barombi Mbo (excluding  
108 *Sarotherodon steinbachi* which is morphologically and ecologically similar to the other three  
109 *Sarotherodon* species), an endemic *Sarotherodon* species pair from Lake Ejagham, and outgroup  
110 *Sarotherodon* individuals from all three river drainages flanking the lake: Cross, Meme, and  
111 Mungo rivers (e.g. see map in (Schliewen et al. 1994)). Details on the collection, extraction,  
112 alignment to the *Oreochromis niloticus* reference genome, and variant calling protocols  
113 following the standard GATK pipeline are provided in the supplementary methods.

114

115 *Characterization of introgression patterns across the genome*

116 First, we exhaustively searched the genomes for patterns of non-monophyletic Barombi Mbo  
117 relationships using the machine learning program SAGUARO (Zamani et al. 2013) to identify  
118 regions of the genome that contained relationships consistent with expectations from multiple  
119 colorizations and secondary gene flow into the radiation (i.e. paraphyletic/polyphyletic Barombi  
120 Mbo radiations). This method infers relationships among individuals in the form of genetic  
121 distance matrices and assigns segments across the genomes to different topologies without a  
122 priori hypotheses about these relationships. We partitioned the genome into a total of 75 unique  
123 topologies (well past the inflection point at 30 topologies where the percent of genome explained  
124 by each additional topology plateaus; Fig S1) to exhaustively search for relationships where  
125 subclades or individual Barombi Mbo species were more closely related to riverine populations  
126 than other species in the crater lake, suggesting sympatric speciation after a hybrid swarm (i.e.  
127 differential sorting of ancestral polymorphism) or secondary gene flow into this subclade  
128 (introgression). Details on the SAGUARO analysis and filtering strategies for calculating  
129 proportions are provided in the supplementary methods.

130 We also looked for evidence of differential introgression within subclades of the radiation  
131 on both a genome-wide and local level using  $f_4$  statistics (Reich et al. 2009; Patterson et al. 2012;  
132 Pickrell and Pritchard 2012). The  $f_4$  statistic tests if branches on a four-taxon tree lack residual  
133 genotypic covariance (as expected in the presence of incomplete lineage sorting and no  
134 introgression) by comparing allele frequencies among the three possible unrooted trees.  
135 We focused on tests of introgression with the two outgroup clades from our sample that came  
136 from two main clusters: riverine populations of *Sarotherodon galilaeus* in the Mungo and Meme  
137 rivers (MM) and riverine populations of *S. galilaeus* from the more distant Cross River (CR).

138 Based on the tree ((P1, P2),(*S. galilaeus* MM, *S. galilaeus* CR)),  $f_4$  statistics were calculated for  
139 combinations of species among a) *Stomatepia*, b) the *Konia* + *Pungu* subclade, and c) *Myaka*  
140 *myaka* with *S. linnelli* as a representative of its sister *Sarotherodon* group. This subset of  
141 groupings was chosen to make these analyses more tractable by focusing on species with unique  
142 trophic ecologies within the radiation. Genome-wide  $f_4$  statistics were calculated using the  
143 fourpop function in Treemix (Pickrell and Pritchard 2012). Standard error was estimated by  
144 jackknifing in windows of 1,000 adjacent SNPs to account for linkage disequilibrium.

145 We characterized heterogeneity in introgression across the genome among these same  
146 combinations and investigated whether differential introgression contributed variation potentially  
147 important in the divergence between species by calculating  $f_4$  statistics in 10-kb sliding windows.  
148 We did this with a modified version of the ABBABABA.py and genomics.py scripts that use  
149 population allele frequencies of biallelic SNPs  
150 ([https://github.com/simonhmartin/genomics\\_general](https://github.com/simonhmartin/genomics_general);(Martin et al. 2015b); our modified version  
151 is provided in the supplementary materials). Significance of  $f_4$  values in sliding windows across  
152 the genome were evaluated using the 1% tails of a null distribution generated from permutations  
153 of the  $f_4$  test. For more details on the sliding window calculations of  $f_4$ , see supplementary  
154 methods.

155 For each of these regions, we looked for annotated genes using the well annotated NCBI  
156 *Oreochromis* Annotation Release 102 and searched their gene ontology in the phenotype  
157 database ‘Phenoscape’ (Mabee et al. 2012; Midford et al. 2013; Manda et al. 2015; Edmunds et  
158 al. 2016) and AmiGO2 (Balsa-Canto et al. 2016) for pertinent functions to the specializations  
159 and observed morphological differences among species, such as skeletal system or pigmentation.  
160

161 *Directionality of introgression*

162 The sign of  $f_4$  does not indicate the directionality of introgression because of the lack of an  
163 explicit outgroup. For example, in the tree (P1,P2),(P3,P4)), a positive  $f_4$  value indicates gene  
164 flow either between P1 and P3 or P2 and P4. We narrowed down the directionality of  
165 introgression detected in these regions using the  $f_d$  statistic, a modified version of the  $D$ -statistic  
166 that looks at allele frequencies fitting two allelic patterns referred to as ABBA and BABA based  
167 on the tree ((P1,P2),P3,O)), where O is an outgroup species in which no gene flow is thought to  
168 occur with the other populations (Martin et al. 2015b). Using two individuals of *Coptodon kottae*  
169 from another Cameroon crater lake as our distantly related outgroup population and the same  
170 riverine and Barombi Mbo population combinations described above,  $f_d$  values were calculated in  
171 10-kb windows across the genome using the same script and window settings as in the  $f_4$  tests of  
172 introgression. The variation in  $f_d$  values per region was higher than  $f_4$  of similar window sizes,  
173 perhaps due to the high variance between windows in number of sites that fit the desired  
174 ABBA/BABA patterns given our outgroup, so we used only those  $f_d$  outliers (the top 2%) that  
175 overlapped with significant  $f_4$  outliers as potentially introgressed regions from which we could  
176 narrow down the two populations in which gene flow occurred.

177 We also visualized the directionality of genome-wide introgression detected with the  $f_4$   
178 statistics using Treemix (v 1.13) (Pickrell and Pritchard 2012). Treemix estimates a maximum  
179 likelihood phylogeny of the focal populations and then fits a user-specified number of migration  
180 edges to the tree by comparing genetic covariances between populations. We ran Treemix with *S.*  
181 *galilaeus* as root, and with 0 through 20 migration edges. To determine the most likely number  
182 of migration events, we performed likelihood-ratio tests comparing each graph to that with one



183 fewer migration event, starting with 1 versus 0 events, and took as the most likely value the first  
184 non-significant comparison.

185

186 *Comparison of patterns of introgression to patterns of genetic divergence and diversity*

187 Reduced levels of genetic polymorphism in a population may indicate a strong selective sweep.

188 We can look at introgressed regions found in only a single Barombi Mbo species for evidence

189 that they have been adaptive, suggesting that secondary gene flow brought in variation

190 potentially important for speciation. To examine genetic diversity in candidate introgressed

191 regions, we calculated between-population nucleotide divergence ( $D_{xy}$ ) and within-population

192 nucleotide diversity ( $\pi$ ) for pairwise species comparisons among the Barombi Mbo focal species

193 and the riverine outgroups.  $D_{xy}$  and  $\pi$  were calculated over the same 10-kb windows as the  $f_4$  tests

194 using the python script popGenWindows.py

195 ([https://github.com/simonhmartin/genomics\\_general](https://github.com/simonhmartin/genomics_general); (Martin et al. 2015b); see supplementary

196 methods for more details on these calculations).

197

## 198 **Results**

199 *Widespread polyphyletic relationships in Barombi Mbo are scattered across small regions of the*

200 *genome*

201 After conservative filtering of segments to remove uninformative regions (see supplementary

202 methods and Table S1), the Barombi Mbo cichlid radiation was a monophyletic group across

203 53% of the genome and only 0.6% was assigned to topologies indicating a polyphyletic Barombi

204 Mbo. These polyphyletic relationships are consistent with many patterns, including secondary

205 gene flow, incomplete lineage sorting, divergent selection, and ancestral population structure.

206 The most prevalent topology spanned 38.2% of the genome and featured the expected species

207 phylogeny for this group, in which all Barombi Mbo individuals form a single clade with distant  
208 relationships to outgroup riverine *Sarotherodon* populations in Cameroon (Fig. 1A). The second  
209 most prevalent topology (spanning 11.8% of the genome) featured identical evolutionary  
210 relationships, except for a much shorter branch leading to *S. galilaeus* Mungo and Meme River  
211 populations (Fig. 1B). Branch lengths produced by SAGUARO have no direct interpretation as  
212 an evolutionary distance (analogous to a neighbor-joining tree), but may be useful for  
213 comparison to similar topologies with different branch lengths, e.g. regions with higher  
214 divergence rates (Zamani et al. 2013).

215 In 0.6% of the genome indicating polyphyletic Barombi Mbo relationships, we found  
216 evidence consistent with multiple colonizations of the lake. Since we were looking for patterns  
217 consistent with secondary gene flow or a hybrid swarm for subclades of the radiation, we  
218 focused on topologies where single species or entire subclades were more closely related to  
219 outgroups than other Barombi Mbo species, which represented only 0.24% of the genome. Some  
220 topologies featured an entire subclade (e.g. *Stomatepia*) as monophyletic, but more closely  
221 related to the riverine populations than other Barombi Mbo species, consistent with a hybrid  
222 swarm scenario before the diversification of the *Stomatepia* subclade. Other topologies featured  
223 individual species more closely related to outgroup riverine populations than sister species,  
224 consistent with secondary gene flow into that lineage after the initiation of divergence. For  
225 example, in *Stomatepia* we found topologies that group multiple species with riverine  
226 populations (Fig. 2A-B), but we also found topologies where individual *Stomatepia* species (*S.*  
227 *mariae* and *S. pindu*; Fig. 2C-D) were more closely related to riverine outgroups than other  
228 *Stomatepia*. In the *Konia + Pungu* subclade, we saw a similar pattern with topologies for the  
229 hypoxia and sponge-eating specialists (*K. dikume* and *P. maclareni*, respectively; Fig. 3A-B) but

230 also a topology where the entire subclade was sister to the riverine outgroup populations (Fig.  
231 3C). In the zooplanktivore *M. myaka*, we found topologies in which *M. myaka* was sister to the  
232 riverine populations (Fig. 4A-B), but also topologies where *M. myaka*, along with all the  
233 Barombi Mbo *Sarotherodon* species, were sister to the riverine outgroup populations (Fig. 4C-  
234 D).

235

### 236 *Genome-wide evidence for differential introgression into the radiation*

237 Consistent with evidence of differential introgression from RAD-seq data (Martin et al. 2015a),  
238 genome-wide  $f_4$  tests provided evidence of genome-wide differential gene flow between some  
239 Barombi Mbo sister species and the outgroup riverine species (Table 1). There was significant  
240 evidence of genome-wide introgression in tests involving both *S. pindu* in the *Stomatepia* species  
241 complex and the hypoxia specialist *K. dikume* in the *Konia + Pungu* subclade. Some species pair  
242 combinations within these subclades did not show evidence of differential gene flow, suggesting  
243 that there may still be sympatric speciation occurring for some species, if not entire subclades.  
244 For example, there was no significant secondary gene flow detected genome-wide in the tests  
245 involving sister species *S. mariae* and *S. mongo* or *M. myaka* and *S. linnelli* (Table 1).

246 We also found evidence for widespread gene flow connecting populations across  
247 Barombi Mbo and neighboring riverine populations in highly interconnected population graphs;  
248 the likelihood of each graph did not plateau until reaching 10 admixture events (Fig S5). On the  
249 Treemix population graph with 10 admixture events, gene flow from the Mungo/Meme River  
250 populations of *S. galilaeus* occurred directly into individual species *S. mongo* and *K. eisentrauti*  
251 rather than the ancestral node of their respective subclades (Fig S6). The proportion of admixture  
252 inferred for these two events (0.1% into *S. mongo* and 0.4% into *K. eisentrauti*) was similar to

253 the small proportions of the genome assigned to topologies consistent with secondary gene flow  
254 in the SAGUARO analyses. These admixture events pointing to the tips of the graphs suggest  
255 secondary gene flow events between nearby riverine populations and individual species within  
256 the radiation. In all population graphs allowing up to 21 migration events, any admixture from  
257 outgroup riverine populations appears to be coming from the Mungo and Meme rivers rather  
258 than the Cross River, consistent with the closer geographic proximity of the former drainages.

259

260 *Very few genomic regions contain signatures of differential introgression between sister species*

261 Very few regions of the genome introgressed into single species from outgroup riverine

262 populations (Fig 5A-C). In *Stomatepia*, only one region introgressed from Mungo/Meme Rivers

263 into *S. pindu* and only three regions into *S. mariae*, respectively, suggesting secondary gene flow

264 after initial diversification of *Stomatepia* (Table 2). Similarly, secondary introgression occurred

265 into the *Konia + Pungu* subclade (Table 2). However, there was also evidence of shared

266 introgression signals among sister species across all three subclades, where two subclade sister

267 species shared introgressed regions from a riverine population. Only 0.000017- 0.0000354% of

268 the genome appears introgressed into a single species of a Barombi Mbo subclade. This number

269 is smaller than suggested in the SAGUARO analysis perhaps due to the conservative

270 significance cut-offs and window size choice for  $f_4$  statistic and that relationships observed in the

271 polyphyletic topologies are consistent with other patterns besides introgression.

272

273 *Evidence for sympatric sorting of ancestral polymorphism within a hybrid swarm*

274 A few of these 10-40 kb regions with peak signals of introgression were also present in multiple

275 subclades, indicating differential assortment of introgressed variation shared among clades. For

276 example, two significant  $f_4$  outliers on linkage group 20 out of the 35 found across the genome  
277 appear within the *Stomatepia*, *Konia*, and *Pungu*, suggesting that some of this introgression may  
278 have occurred in the ancestral stages of the radiation and differentially sorted among species.

279 We also found 11 regions across the sister species pairs in which one species was more  
280 similar to one outgroup riverine population while its sister species was more similar to the other  
281 riverine population (Table 2). This signal is consistent with a hybrid swarm scenario due to  
282 multiple colonizations by riverine populations before diversification of some of the sister species  
283 and the sorting of polymorphisms brought in by these populations among incipient Barombi Mbo  
284 species. For example, two regions that appear to be differentially sorted between *S. galilaeus* and  
285 *S. mariae* and *S. pindu* from *S. galilaeus* CR versus *S. mongo* from *S. galilaeus* MM. Similar  
286 patterns were found scattered across the genomes for *K. eisentrauti* and *K. dikume* versus *P.*  
287 *maclareni* and *M. myaka* versus *S. linelli*.

#### 288 *Weak support for functional importance of introgressed regions for species diversification*

289 Although we did find evidence of differential introgression among sister species scattered across  
290 a small proportion of the genome, the types of genes found in these regions painted no clear  
291 picture of how introgressed variation may have contributed to speciation (Table 2). For example,  
292 differential introgression in *Stomatepia* occurred in regions with genes involved in a large range  
293 of biological processes, including intracellular signal transduction, immune system response, and  
294 motor neuron axon development (Table 2), with no obvious links to the highly divergent  
295 morphological, ecological, or patterning traits observed between these species (Martin 2012) nor  
296 to those traits normally associated with adaptive radiation in cichlid fishes such as body shape,  
297 pharyngeal jaw morphology, retinal pigments, or male coloration (Kocher 2004; Barluenga et al.

299 2006; Wagner et al. 2012; Brawand et al. 2014; Malinsky et al. 2015; Meier et al. 2017).  
300 Similarly, in both the *Konia* + *Pungu* and *Myaka* + *Sarotherodon* subclades, introgressed regions  
301 were near genes involved in a large range of biological processes not clearly associated with  
302 adaptive ecological traits in these species, such as *K. dikume*'s hypoxia tolerance, *P. maclareni*'s  
303 spongivory, and *M. myaka*'s zooplanktivory. For example, while there appears to be differential  
304 introgression in *Konia* in a region containing *pafah1b3*, a gene involved in platelet activation  
305 activity, and *K. dikume*'s deep water specialization includes higher blood volume with higher  
306 concentrations of hemoglobin (Green et al. 1973), it is not obvious how introgressed variation in  
307 *pafah1b3* would have played a role in the evolution of these traits from studies of its function in  
308 model organisms, which includes spermatogenesis and sterility in mice (Prescott et al. 2000;  
309 Koizumi et al. 2003; Yan et al. 2003).

310         Similarly, the amount of genetic diversity in introgressed regions does not suggest strong  
311 divergent selection on introgressed genetic variation due to hard selective sweeps. In line with  
312 the presence of peaks in  $f_4$  values in these regions, between-population diversity ( $D_{xy}$ ) was  
313 typically high between one of the species and its sister species (Fig. 6). However, within-  
314 population diversity across many of these regions was often greater or comparable to scaffold  
315 and genome-wide averages (Table S2-4), suggesting these regions may not have experienced  
316 hard selective sweeps that would support their role in adaptive divergence among species (Fig.  
317 6). In summary, although we found evidence for differential secondary gene flow between sister  
318 species in the radiation, we did not find strong functional support from gene ontology terms nor  
319 signatures of selection that the introgressed alleles were important for sympatric species  
320 diversification.

321

## 322 **Discussion**

323 *Little evidence that secondary gene flow promoted the diversification of Barombi Mbo cichlids*

324 Our fine-scale investigations of introgression across the genomes of a celebrated putative  
325 example of sympatric speciation are consistent with two possible scenarios: 1) sympatric  
326 speciation in the presence of continuous neutral secondary gene flow into the radiation, or 2)  
327 speciation initiated by secondary gene flow. We found little support for the latter allopatric  
328 scenario from both a learning machine and sliding-window approach. From the SAGUARO  
329 analyses, our most conservative estimate of introgression into single species of the radiation  
330 ranges from 0.013 -0.019% of the genome. Estimates are similarly small from the  $f_4$  statistics,  
331 ranging from 0.000017- 0.0000354% of the genome (Fig 7). Furthermore, even these significant  
332 outliers may represent false positives. First, our method of selecting introgressed regions from  
333 the 1% tails of a null distribution can always find outliers, even in the absence of introgression.  
334 Second, it is also difficult to distinguish signatures of differential introgression from the biased  
335 assortment of ancestral polymorphism into modern lineages, e.g. a hybrid swarm scenario that  
336 would still result in sympatric divergence entirely within the crater lake. Finally, even if our  
337 statistical outliers represent differentially introgressed regions, their importance to the speciation  
338 process is equivocal. We found no evidence of selective sweeps in these regions that would  
339 suggest they aided in divergence between species and they contain mainly housekeeping genes  
340 that do not clearly suggest how introgressed variation would have contributed to the radiation.

341 This contrasts studies on other systems using similar approaches which found compelling  
342 cases for adaptive introgression contributing to diversification (e.g. Abi-Rached et al. 2011; The  
343 Heliconius Genome Consortium et al. 2012; Huerta-Sánchez et al. 2014; Lamichhaney et al.  
344 2015; Stankowski and Streisfeld 2015; Arnold et al. 2016; Meier et al. 2017), including our own

345 previous work (Richards and Martin 2017). For example, several studies have found convincing  
346 candidate genes/variants in introgressed regions to suggest that adaptive introgression played a  
347 role in shaping ecological and morphological diversity. These include the detection of  
348 introgressed alleles linked to wing-color patterning involved in mimicry and mate selection in  
349 *Heliconius* butterflies (The Heliconius Genome Consortium et al. 2012), flower coloration  
350 involved in pollinator preferences for *Mimulus* species (Stankowski and Streisfeld 2015), and  
351 oral jaw size variation involved in scale-eating trophic specialization in *Cyprinodon* pupfishes  
352 (Richards and Martin 2017).

353  
354 *Evidence for a hybrid swarm further complicates the role of gene flow in the speciation process*  
355 *in Barombi Mbo cichlids*

356 Beyond speciation scenarios involving secondary gene flow, our findings also suggest another  
357 scenario for sympatric speciation in this system: sympatric speciation from a hybrid swarm  
358 involving the differential sorting of ancestral polymorphism among incipient species. A hybrid  
359 swarm is not easily detectable using the  $f_d$  statistic because introgressed variation could be shared  
360 among diverging sister species, leading to an  $f_d$  value of zero (Reich et al. 2009; Patterson et al.  
361 2012). However, many of the  $f_d$  peaks appear to be shared across at least two of the sister species  
362 in a subclade, shared between species of different subclades, or contain variation from both  
363 riverine populations (Mungo/Meme and Cross Rivers) that has been differentially sorted among  
364 sister species. All three of these patterns are consistent with an ancestral hybrid swarm before  
365 divergence between sister species occurred. This pattern of differential sorting of variation from  
366 a hybrid swarm from  $f_d$  analyses could also result from a lack of power in the statistic to  
367 distinguish the directionality of the introgression detected in those regions when using biallelic



368 patterns and four populations (e.g. when two populations share similar allele patterns, the other  
369 two populations can share the opposite allele pattern by default). However, we also found  
370 evidence that entire subclades (e.g. *Stomatepia*) were more closely related to riverine populations  
371 than other Barombi Mbo subclades from the SAGUARO analyses that are also consistent with a  
372 hybrid swarm (e.g. Fig 2).

373         There are some caveats to our interpretations of secondary gene flow and its weak  
374 functional role in the ecological and morphological diversity observed within the lake.  
375 Recombination rate varies across genomes and determines the scale over which patterns of  
376 admixture and differentiation vary (Smukowski and Noor 2011). In our fixed sliding window  
377 size of 10-kb, we may have missed important patterns of introgression in regions of  
378 recombination hotspots, where such patterns are expected to be very fine-scale. Shared variation  
379 among species may reflect unsorted polymorphism from structured ancestral populations rather  
380 than hybridization. Introgression events can also be hard to distinguish from ongoing balancing  
381 selection of ancestral polymorphism that is sieved between species (Guerrero and Hahn 2017).  
382 While we focused on searching for genetic signatures of hard selective sweeps in introgressed  
383 regions, some of them with intermediate to high nucleotide diversity may have undergone soft  
384 selective sweeps, when selection drives multiple adaptive haplotypes to fixation. Some of these  
385 introgressed regions may have been adaptive and undergone soft selective sweeps, although the  
386 relative contributions of hard sweeps versus soft sweeps during adaptation and speciation is still  
387 the subject of much debate (Hermisson and Pennings 2005, 2017; Pritchard et al. 2010; Jensen  
388 2014; Schrider et al. 2015).

389

390 *Best remaining cases for sympatric speciation within Barombi Mbo cichlid radiation*

391 While the radiation as a whole may not have entirely arisen from sympatric speciation, some  
392 sister species within Barombi Mbo are better case studies of the process than others. Within the  
393 three-species *Stomatepia* subclade, there is little evidence that secondary gene flow played an  
394 important role in diversification. On a genome-wide level, we detected secondary gene flow in  $f_4$   
395 tests involving *S. pindu*. However, on a finer scale the one introgressed region unique to *S. pindu*  
396 is unannotated and the three introgressed regions unique to *S. mariae* contain four housekeeping  
397 genes involved in extracellular exosome activity and plasma membranes  
398 (*jmjd8, prss1, cldn4, muc19*). Shared signals of introgression among the three species represent a  
399 larger proportion of the genome than differentially introgressed regions, although both types of  
400 introgressed material appear to be rare in the genome (< 0.045%; Fig 7). The high ecological and  
401 morphological overlap among *Stomatepia* species suggests that this species complex may be  
402 stalled in the earliest stages of divergence. For example, *S. pindu* and *S. mariae* appear to be at the  
403 extremes of a unimodal distribution of phenotypes; this is one major prediction of sympatric  
404 speciation models in the presence of only weak disruptive selection on ecological traits (e.g.  
405 (Matessi et al. 2002; Burger et al. 2006)), as measured in this species pair (Martin 2012).

406 Even for the two monotypic specialist species *M. myaka* and *P. maclareni*, there is  
407 minimal evidence for a role of secondary gene flow in the evolution of their trophic  
408 specializations. On a genome-wide level, the tests for differential introgression with one of the  
409 specialists and another species from the radiation were not significant. For the two regions which  
410 appear to be differentially introgressed between riverine populations and the zooplantivore *M.*  
411 *myaka*, one has no annotations, suggesting it may be neutral gene flow while the other is an  
412 introgressed region in other subclades, a signal of differential sorting of variation after a hybrid  
413 swarm. For spongivore specialist *Pungu maclareni*, we found only a single region differentially

414 introgressed with riverine populations. This region contains *ddn1*, a gene involved in serine-type  
415 peptidase activity, proteins which are found ubiquitously in prokaryotes and eukaryotes.

416         Among all the ecologically divergent species pairs focused on in this study, *K. eisentrauti*  
417 and *K. dikume* are the least convincing as a putative case for sympatric speciation between sister  
418 species. Similar to *Stomatepia*, there is more evidence for shared introgression in regions of the  
419 *Konia* genome than differentially introgressed regions (Fig 8). However, differential  
420 introgression between the two *Konia* species occurs in regions with the best potential candidates  
421 in this study for contributing to diversification (although these regions are still not as strong as  
422 the ‘smoking guns’ observed in our past study of introgressed variation, e.g. Richards and Martin  
423 2017). The gene *pafah1b3*, which is involved in platelet activation activity, is differentially  
424 introgressed between *Konia* species and may function in *K. dikume*’s deep water specialization  
425 of higher blood volume with higher concentrations of hemoglobin (Green et al. 1973). However,  
426 studies of the phenotypic effects of *pafah1b3* in model organisms do not hint at a role in  
427 hemoglobin concentration. Instead, mutations in this gene have been suggested to play a role in  
428 male spermatogenesis and fertility in mice (Koizumi et al. 2003; Yan et al. 2003). We also see  
429 differential introgression in a region containing the gene *ehmt2*, which is involved in  
430 neurogenesis and retinal cell differentiation. While it is not as directly clear how introgressed  
431 variation in this gene would have contributed to divergence among the *Konia* sister species,  
432 variation in visual traits such as color perception are important axes of diversification in other  
433 cichlid radiations, particularly along a depth gradient (Terai et al. 2002, 2006; Seehausen et al.  
434 2008). These two species also exist in microallopatry; *K. eisentrauti* is an abundant detritivore  
435 along the shallow littoral region of the lake while *K. dikume* is a deep-water specialist on

436 *Chaoborus* midge larvae which is only collected in deep-water gill nets (Trewavas et al. 1972;  
437 Schliewen 1994). Both species are mouthbrooders and likely breed in non-overlapping habitats.

438

#### 439 *Conclusion*

440 The complex history of colonization in the crater evidenced in this and a previous genome-wide  
441 study suggests allopatric phases of the speciation process in the radiation, which violates one of  
442 the strict criteria for demonstrating sympatric speciation in the wild (Coyne and Orr 2004).

443 Nonetheless, from our fine-scale dissection of where in the genome these signals are coming  
444 from, we cannot point to a functional role for secondary gene flow in the speciation process  
445 across any of the subclades. This suggests that either variation in genes with undiscovered  
446 functional effects underlies the divergent ecologies and morphologies seen in the lake or that any  
447 secondary gene flow was neutral with regard to its role in the speciation process. We also find  
448 evidence to support sympatric speciation after a hybrid swarm that resulted from multiple  
449 colonizations of the lake, still consistent with a scenario of sympatric speciation through  
450 differential sorting of ancestral polymorphism. Disentangling the effects of a putative hybrid  
451 swarm from secondary contact events on the speciation process will require a better  
452 understanding of the timing of gene flow events compared to the diversification times of  
453 Barombi Mbo species. We found evidence for gene flow into the radiation both before and after  
454 initial diversification of subclades within the lake. Even without this information, weak support  
455 for a functional role of secondary gene flow in the radiation of Barombi Mbo cichlids suggests  
456 that we should not rule out this example of a sympatric radiation just yet.

457

458

459 **Acknowledgements**

460 This study was funded by a National Geographic Society Young Explorer's Grant, a Lewis and  
461 Clark Field Research grant from the American Philosophical Society, and the University of  
462 North Carolina at Chapel Hill to CHM. We gratefully acknowledge the Cameroonian  
463 government and the local chiefs of Barombi Mbo village and surrounding communities for  
464 permission to conduct this research. We thank Cyrille Dening Touokong and Jackson Waite-  
465 Himmelwright for field assistance and Nono Gonwuou for help obtaining permits.

466

467 **Author contributions**

468 EJR wrote the manuscript. EJR conducted all analyses except for Treemix; JP conducted  
469 Treemix analyses. CHM collected samples and provided the genomic data. All authors  
470 contributed to the development of ideas presented in the study and revised the manuscript.

471

472 **Data Accessibility**

473 All datasets used for this study will be deposited in Dryad and the NCBI Short Read Archive  
474 (SRA).

475 **Competing Interests**

476 We declare no competing financial interests.

477

478

479

480

481

482 **References**

- 483 Abi-Rached, L., M. J. Jobin, S. Kulkarni, A. McWhinnie, K. Dalva, L. Gragert, F. Babrzadeh, B.  
484 Gharizadeh, M. Luo, F. A. Plummer, J. Kimani, M. Carrington, D. Middleton, R.  
485 Rajalingam, M. Beksac, S. G. E. Marsh, M. Maiers, L. A. Guethlein, S. Tavoularis, A.-M.  
486 Little, R. E. Green, P. J. Norman, and P. Parham. 2011. The Shaping of Modern Human  
487 Immune Systems by Multiregional Admixture with Archaic Humans. *Science* (80-. ).  
488 334:89 LP-94.
- 489 Alcaide, M., E. S. C. Scordato, T. D. Price, and D. E. Irwin. 2014. Genomic divergence in a ring  
490 species complex. *Nature* 511:83–85. Nature Publishing Group.
- 491 Arnold, B. J., B. Lahner, J. M. DaCosta, C. M. Weisman, J. D. Hollister, D. E. Salt, K. Bomblies,  
492 and L. Yant. 2016. Borrowed alleles and convergence in serpentine adaptation. *Proc. Natl.*  
493 *Acad. Sci.* 113:8320–8325.
- 494 Balsa-Canto, E., D. Henriques, A. Gabor, and J. R. Banga. 2016. AMIGO2, a toolbox for  
495 dynamic modeling, optimization and control in systems biology. *Bioinformatics* 32:1–2.
- 496 Barluenga, M., K. N. Stölting, W. Salzburger, M. Muschick, and A. Meyer. 2006. Sympatric  
497 speciation in Nicaraguan crater lake cichlid fish. *Nature* 439:719–723.
- 498 Bolnick, D. I., and B. M. Fitzpatrick. 2007. Linked references are available on JSTOR for this  
499 article : Sympatric Speciation : Models and Empirical Evidence. *Annu. Rev. Ecol. Evol.*  
500 *Syst.* 38:459–487.
- 501 Brawand, D., C. E. Wagner, Y. I. Li, M. Malinsky, I. Keller, S. Fan, O. Simakov, A. Y. Ng, Z.  
502 W. Lim, E. Bezault, Turner-Maier, J. J. Johnson, R. Alcazar, H. J. Noh, P. Russell, B. Aken,  
503 J. Alföldi, C. Amemiya, N. Azzouzi, J.-F. Baroiller, F. Barloy-Hubler, A. Berlin, R.  
504 Bloomquist, K. L. Carleton, M. a. Conte, H. D’Cotta, O. Eshel, L. Gaffney, F. Galibert, H.

505 F. Gante, S. Gnerre, L. Greuter, R. Guyon, N. S. Haddad, W. Haerty, R. M. Harris, H. a.  
506 Hofmann, T. Hourlier, G. Hulata, D. B. Jaffe, M. Lara, L. A.P., I. MacCallum, S. Mwaiko,  
507 M. Nikaido, H. Nishihara, C. Ozouf-Costaz, D. J. Penman, D. Przybylski, M. Rakotomanga,  
508 S. C. P. Renn, F. J. Ribeiro, M. Ron, W. Salzburger, L. Sanchez-Pulido, M. E. Santos, S.  
509 Searle, T. Sharpe, R. Swofford, F. J. Tan, L. Williams, S. Young, S. Yin, N. Okada, T. D.  
510 Kocher, E. a. Miska, E. S. Lander, B. Venkatesh, R. D. Fernald, A. Meyer, C. P. Ponting, J.  
511 T. Streebman, K. Lindblad-Toh, O. Seehausen, and F. Di Palma. 2014. The genomic  
512 substrate for adaptive radiation in African cichlid fish. *Nature* 513:375–381.  
513 Burger, R., K. A. Schneider, and M. Willensdorfer. 2006. The Conditions for Speciation through  
514 Intraspecific Competition. *Evolution* (N. Y). 60:2185–2206. [Society for the Study of  
515 Evolution, Wiley].  
516 Coyne, J. A., and H. A. Orr. 2004. *Speciation*. Sutherland, MA.  
517 Cruickshank, T. E., and M. W. Hahn. 2014. Reanalysis suggests that genomic islands of  
518 speciation are due to reduced diversity, not reduced gene flow. *Mol. Ecol.* 23:3133–3157.  
519 Cutter, A. D., and B. A. Payseur. 2013. Genomic signatures of selection at linked sites: unifying  
520 the disparity among species. *Nat. Rev. Genet.* 14:262–274. Nature Publishing Group.  
521 Edmunds, R. C., B. Su, J. P. Balhoff, B. F. Eames, W. M. Dahdul, H. Lapp, J. G. Lundberg, T. J.  
522 Vision, R. A. Dunham, P. M. Mabee, and M. Westerfield. 2016. Phenoscope: Identifying  
523 candidate genes for evolutionary phenotypes. *Mol. Biol. Evol.* 33:13–24.  
524 Feder, J. L., S. P. Egan, and P. Nosil. 2012. The genomics of speciation-with-gene-flow. *Trends*  
525 *Genet.* 28:342–350.  
526 Geiger, M. F., J. K. McCrary, and U. K. Schlieven. 2013. Crater Lake Apoyo Revisited -  
527 Population Genetics of an Emerging Species Flock. *PLoS One* 8:1–17.

- 528 Green, J., S. A. Corbet, and E. Betney. 1973. Ecological studies on crater lakes in West  
529 Cameroon The blood of endemic cichlids in Barombi Mbo in relation to stratification and  
530 their feeding habits. *J. Zool.* 170:299–308. Blackwell Publishing Ltd.
- 531 Guerrero, R. F., and M. W. Hahn. 2017. Speciation as a sieve for ancestral polymorphism. *Mol.*  
532 *Ecol.* 1–7.
- 533 Harr, B. 2006. Genomic islands of differentiation between house mouse subspecies Genomic  
534 islands of differentiation between house mouse subspecies. 730–737.
- 535 Hermisson, J., and P. S. Pennings. 2005. Soft Sweeps. *Genetics* 169:2335 LP-2352.
- 536 Hermisson, J., and P. S. Pennings. 2017. Soft sweeps and beyond: understanding the patterns and  
537 probabilities of selection footprints under rapid adaptation. *Methods Ecol. Evol.* 8:700–716.
- 538 Huerta-Sánchez, E., X. Jin, Asan, Z. Bianba, B. M. Peter, N. Vinckenbosch, Y. Liang, X. Yi, M.  
539 He, M. Somel, P. Ni, B. Wang, X. Ou, Huasang, J. Luosang, Z. X. P. Cuo, K. Li, G. Gao,  
540 Y. Yin, W. Wang, X. Zhang, X. Xu, H. Yang, Y. Li, J. Wang, J. Wang, and R. Nielsen.  
541 2014. Altitude adaptation in Tibetans caused by introgression of Denisovan-like DNA.  
542 *Nature* 512:194–197.
- 543 Igea, J., D. Bogarín, A. S. T. Papadopulos, and V. Savolainen. 2015. A comparative analysis of  
544 island floras challenges taxonomy-based biogeographical models of speciation. *Evolution*  
545 (N. Y). 69:482–491.
- 546 Jensen, J. D. 2014. On the unfounded enthusiasm for soft selective sweeps. *Nat. Commun.*  
547 5:5281.
- 548 Jones, F. C., M. G. Grabherr, Y. F. Chan, P. Russell, E. Mauceli, J. Johnson, R. Swofford, M.  
549 Pirun, M. C. Zody, S. White, E. Birney, S. Searle, J. Schmutz, J. Grimwood, M. C. Dickson,  
550 R. M. Myers, C. T. Miller, B. R. Summers, A. K. Knecht, S. D. Brady, H. Zhang, A. A.



- 551 Pollen, T. Howes, C. Amemiya, Broad Institute Genome Sequencing Platform & Whole  
552 Genome Assembly Team, E. S. Lander, F. Di Palma, K. Lindblad-Toh, and D. M. Kingsley.  
553 2012. The genomic basis of adaptive evolution in threespine sticklebacks. *Nature* 484:55–  
554 61.
- 555 Kautt, A. F., G. Machado-Schiaffino, J. Torres-Dowdall, and A. Meyer. 2016. Incipient  
556 sympatric speciation in Midas cichlid fish from the youngest and one of the smallest crater  
557 lakes in Nicaragua due to differential use of the benthic and limnetic habitats? *Ecol. Evol.*  
558 6:5342–5357.
- 559 Kocher, T. D. 2004. Adaptive evolution and explosive speciation: the cichlid fish model. *Nat.*  
560 *Rev. Genet.* 5:288–298.
- 561 Koizumi, H., N. Yamaguchi, M. Hattori, T. O. Ishikawa, J. Aoki, M. M. Taketo, K. Inoue, and  
562 H. Arai. 2003. Targeted disruption of intracellular type I platelet activating factor-  
563 acetylhydrolase catalytic subunits causes severe impairment in spermatogenesis. *J. Biol.*  
564 *Chem.* 278:12489–12494.
- 565 Lamichhaney, S., J. Berglund, M. S. Almén, K. Maqbool, M. Grabherr, A. Martinez-Barrio, M.  
566 Promerová, C.-J. Rubin, C. Wang, N. Zamani, B. R. Grant, P. R. Grant, M. T. Webster, and  
567 L. Andersson. 2015. Evolution of Darwin’s finches and their beaks revealed by genome  
568 sequencing. *Nature* 518:371–375.
- 569 Mabee, P., J. P. Balhoff, W. M. Dahdul, H. Lapp, P. E. Midford, T. J. Vision, and M.  
570 Westerfield. 2012. 500,000 fish phenotypes: The new informatics landscape for  
571 evolutionary and developmental biology of the vertebrate skeleton. *J. Appl. Ichthyol.*  
572 28:300–305.
- 573 Malinsky, M., R. J. Challis, A. M. Tyers, S. Schiffels, Y. Terai, B. P. Ngatunga, E. A. Miska, R.

- 574 Durbin, M. J. Genner, and G. F. Turner. 2015. Genomic islands of speciation separate  
575 cichlid ecomorphs in an East African crater lake. *Science* (80-. ). 350:1493–1498.
- 576 Manda, P., J. P. Balhoff, H. Lapp, P. Mabee, and T. J. Vision. 2015. Using the phenoscape  
577 knowledgebase to relate genetic perturbations to phenotypic evolution. *Genesis* 53:561–  
578 571.
- 579 Martin, C. H. 2012. Weak Disruptive Selection and Incomplete Phenotypic Divergence in Two  
580 Classic Examples of Sympatric Speciation: Cameroon Crater Lake Cichlids. *Am. Nat.*  
581 180:E90–E109.
- 582 Martin, C. H., J. S. Cutler, J. P. Friel, C. Dening Touokong, G. Coop, and P. C. Wainwright.  
583 2015a. Complex histories of repeated gene flow in Cameroon crater lake cichlids cast doubt  
584 on one of the clearest examples of sympatric speciation. *Evolution* (N. Y). 69:1406–1422.
- 585 Martin, S. H., K. K. Dasmahapatra, N. J. Nadeau, C. Slazar, J. R. Walters, F. Simpson, M.  
586 Blaxter, A. Manica, J. Mallet, and C. D. Jiggins. 2013. Genome-wide evidence for  
587 speciation with gene flow in *Heliconius* butterflies. *Genome Res.* 23:1817–1828.
- 588 Martin, S. H., J. W. Davey, and C. D. Jiggins. 2015b. Evaluating the use of ABBA-BABA  
589 statistics to locate introgressed loci. *Mol. Biol. Evol.* 32:244–257.
- 590 Matessi, C., A. Gimelfarb, and S. Gavrillets. 2002. Long-term Buildup of Reproductive Isolation  
591 Promoted by Disruptive Selection: How Far Does it Go? *Selection* 2:41–64. Akadémiai  
592 Kiadó.
- 593 McGirr, J. A., and C. H. Martin. 2016. Novel candidate genes underlying extreme trophic  
594 specialization in Caribbean pupfishes. *Mol. Biol. Evol.* msw286.
- 595 Meier, J. I., D. A. Marques, S. Mwaiko, C. E. Wagner, L. Excoffier, and O. Seehausen. 2017.  
596 Ancient hybridization fuels rapid cichlid fish adaptive radiations. *Nat. Commun.* 8:14363.

597 Nature Publishing Group.

598 Midford, P. E., T. Dececchi, J. P. Balhoff, W. M. Dahdul, N. Ibrahim, H. Lapp, J. G. Lundberg,  
599 P. M. Mabee, P. C. Sereno, M. Westerfield, T. J. Vision, D. C. Blackburn, S. Federhen, P.  
600 Mabee, J. Balhoff, W. Dahdul, H. Lapp, P. Midford, T. Vision, M. Westerfield, W. Dahdul,  
601 J. Balhoff, J. Engeman, T. Grande, E. Hilton, C. Kothari, H. Lapp, J. Lundberg, P. Midford,  
602 T. Vision, M. Westerfield, P. Mabee, F. Fang, M. Toledo-Piza, M. Uhen, A. Barnosky, B.  
603 Bills, J. Blois, M. Carrano, M. Carrasco, G. Erickson, J. Eronen, M. Fortelius, R. Graham,  
604 E. Grimm, M. O’Leary, A. Mast, W. Piel, P. Polly, L. Saila, J. Balhoff, P. Midford, H.  
605 Lapp, M. Ghiselin, S. Schulz, H. Stenzhorn, M. Boeker, D. Thau, N. Franz, B. Smith, M.  
606 Ashburner, C. Rosse, J. Bard, W. Bug, W. Ceusters, L. Goldberg, K. Eilbeck, A. Ireland, C.  
607 Mungall, O. Consortium, N. Leontis, P. Rocca-Seraa, A. Ruttenberg, S. Sansone, R.  
608 Scheuermann, N. Shah, P. Whetzel, S. Lewis, J. Beaulieu, R. Ree, J. Cavender-Bares, G.  
609 Weiblen, and M. Donoghue. 2013. The vertebrate taxonomy ontology: a framework for  
610 reasoning across model organism and species phenotypes. *J. Biomed. Semantics* 4:34.

611 Nachman, M. W., and B. A. Payseur. 2012. Recombination rate variation and speciation:  
612 theoretical predictions and empirical results from rabbits and mice. *Philos. Trans. R. Soc. B*  
613 *Biol. Sci.* 367:409–421.

614 Noor, M., and S. Bennett. 2009. Islands of speciation or mirages in the desert? Examining the  
615 role of restricted recombination in maintaining species. *Heredity (Edinb)*. 103:439–444.

616 Nosil, P., and J. L. Feder. 2012a. Genomic divergence during speciation: causes and  
617 consequences. *Philos. Trans. R. Soc. B Biol. Sci.* 367:332–342.

618 Nosil, P., and J. L. Feder. 2012b. Widespread yet heterogeneous genomic divergence. *Mol. Ecol.*  
619 21:2829–2832.

- 620 Papadopulos, A. S. T., W. J. Baker, D. Crayn, R. K. Butlin, R. G. Kynast, I. Hutton, and V.  
621 Savolainen. 2011. Speciation with gene flow on Lord Howe Island. *Proc. Natl. Acad. Sci.*  
622 108:13188–13193.
- 623 Patterson, N., P. Moorjani, Y. Luo, S. Mallick, N. Rohland, Y. Zhan, T. Genschoreck, T.  
624 Webster, and D. Reich. 2012. Ancient Admixture in Human History. *Genetics* 192:1069–  
625 1093.
- 626 Pickrell, J. K., and J. K. Pritchard. 2012. Inference of Population Splits and Mixtures from  
627 Genome-Wide Allele Frequency Data. *PLoS Genet.* 8.
- 628 Poelstra, J. W., N. Vijay, C. M. Bossu, H. Lantz, B. Ryll, I. Muller, V. Baglione, P. Unneberg,  
629 M. Wikelski, M. G. Grabherr, and J. B. W. Wolf. 2014. The genomic landscape underlying  
630 phenotypic integrity in the face of gene flow in crows. *Science* (80-. ). 344:1410–1414.
- 631 Prescott, S. M., G. a Zimmerman, D. M. Stafforini, and T. M. McIntyre. 2000. Platelet activating  
632 factor. *Annu. Rev. Biochem.* 69:419–445.
- 633 Pritchard, J. K., J. K. Pickrell, and G. Coop. 2010. The Genetics of Human Adaptation: Hard  
634 Sweeps, Soft Sweeps, and Polygenic Adaptation. *Curr. Biol.* 20:R208–R215.
- 635 Ravinet, M., R. Faria, R. K. Butlin, J. Galindo, N. Bierne, M. Rafajlović, M. A. F. Noor, B.  
636 Mehlig, and A. M. Westram. 2017. Interpreting the genomic landscape of speciation: a road  
637 map for finding barriers to gene flow. *J. Evol. Biol.* 30:1450–1477.
- 638 Reich, D., K. Thangaraj, N. Patterson, A. L. Price, and L. Singh. 2009. Reconstructing Indian  
639 population history. *Nature* 461:489–94.
- 640 Richards, E. J., and C. H. Martin. 2017. Adaptive introgression from distant Caribbean islands  
641 contributed to the diversification of a microendemic adaptive radiation of trophic specialist  
642 pupfishes.

- 643 Schliewen, U. K., and B. Klee. 2004. Reticulate sympatric speciation in Cameroonian crater lake  
644 cichlids. *Front. Zool.* 1:5.
- 645 Schliewen, U. K., D. Tautz, and S. Paabo. 1994. Sympatric speciation suggested by monophyly  
646 of crater lake cichlids. *Nature* 368:629–631.
- 647 Schrider, D. R., F. K. Mendes, M. W. Hahn, and A. D. Kern. 2015. Soft Shoulders Ahead:  
648 Spurious Signatures of Soft and Partial Selective Sweeps Result from Linked Hard Sweeps.  
649 *Genetics* 200:267 LP-284.
- 650 Seehausen, O., Y. Terai, I. S. Magalhaes, K. L. Carleton, H. D. J. Mrosso, R. Miyagi, I. van der  
651 Sluijs, M. V. Schneider, M. E. Maan, H. Tachida, H. Imai, and N. Okada. 2008. Speciation  
652 through sensory drive in cichlid fish. *Nature* 455:620–626.
- 653 Smukowski, C. S., and M. A. F. Noor. 2011. Recombination rate variation in closely related  
654 species. *Heredity (Edinb)*. 107:496–508. The Genetics Society.
- 655 Soria-Carrasco, V., Z. Gompert, A. A. Comeault, T. E. Farkas, T. L. Parchman, J. S. Johnston, C.  
656 A. Buerkle, J. L. Feder, J. Bast, T. Schwander, S. P. Egan, B. J. Crespi, and P. Nosil. 2014.  
657 Stick Insect Genomes Reveal Natural Selection’s Role in Parallel Speciation. *Science* (80-.  
658 ). 344:738 LP-742.
- 659 Stankowski, S., and M. A. Streisfeld. 2015. Introgressive hybridization facilitates adaptive  
660 divergence in a recent radiation of monkeyflowers. *Proc. R. Soc. London B* 282:20151666.
- 661 Terai, Y., W. E. Mayer, J. Klein, H. Tichy, and N. Okada. 2002. The effect of selection on a long  
662 wavelength-sensitive (LWS) opsin gene of Lake Victoria cichlid fishes. *Proc. Natl. Acad.*  
663 *Sci.* 99:15501–15506.
- 664 Terai, Y., O. Seehausen, T. Sasaki, K. Takahashi, S. Mizoiri, T. Sugawara, T. Sato, M.  
665 Watanabe, N. Konijnendijk, H. D. J. Mrosso, H. Tachida, H. Imai, Y. Shichida, and N.

- 666 Okada. 2006. Divergent selection on opsins drives incipient speciation in Lake Victoria  
667 cichlids. *PLoS Biol.* 4:2244–2251.
- 668 The Heliconius Genome Consortium, K. K. Dasmahapatra, J. R. Walters, A. D. Briscoe, J. W.  
669 Davey, A. Whibley, N. J. Nadeau, A. V. Zimin, D. S. T. Hughes, L. C. Ferguson, S. H.  
670 Martin, C. Salazar, J. J. Lewis, S. Adler, S.-J. Ahn, D. a. Baker, S. W. Baxter, N. L.  
671 Chamberlain, R. Chauhan, B. a. Counterman, T. Dalmay, L. E. Gilbert, K. Gordon, D. G.  
672 Heckel, H. M. Hines, K. J. Hoff, P. W. H. Holland, E. Jacquin-Joly, F. M. Jiggins, R. T.  
673 Jones, D. D. Kapan, P. Kersey, G. Lamas, D. Lawson, D. Mapleson, L. S. Maroja, A.  
674 Martin, S. Moxon, W. J. Palmer, R. Papa, A. Papanicolaou, Y. Pauchet, D. a. Ray, N.  
675 Rosser, S. L. Salzberg, M. a. Supple, A. SurrIDGE, A. Tenger-Trolander, H. Vogel, P. a.  
676 Wilkinson, D. Wilson, J. a. Yorke, F. Yuan, A. L. Balmuth, C. Eland, K. Gharbi, M.  
677 Thomson, R. a. Gibbs, Y. Han, J. C. Jayaseelan, C. Kovar, T. Mathew, D. M. Muzny, F.  
678 Ongeri, L.-L. Pu, J. Qu, R. L. Thornton, K. C. Worley, Y.-Q. Wu, M. Linares, M. L.  
679 Blaxter, R. H. Ffrench-Constant, M. Joron, M. R. Kronforst, S. P. Mullen, R. D. Reed, S. E.  
680 Scherer, S. Richards, J. Mallet, W. Owen McMillan, and C. D. Jiggins. 2012. Butterfly  
681 genome reveals promiscuous exchange of mimicry adaptations among species. *Nature*  
682 487:94–98.
- 683 Trewavas, E., J. Green, and S. A. Corbet. 1972. Ecological studies on crater lakes in West  
684 Cameroon fishes of Barombi Mbo. *J. Zool.* 41–95.
- 685 Turner, T. L., M. W. Hahn, and S. V. Nuzhdin. 2005. Genomic islands of speciation in  
686 *Anopheles gambiae*. *PLoS Biol.* 3:1572–1578.
- 687 Wagner, C. E., L. J. Harmon, and O. Seehausen. 2012. Ecological opportunity and sexual  
688 selection together predict adaptive radiation. *Nature* 487:366–369. Nature Publishing

689 Group.

690 Wu, C.-I., and C.-T. Ting. 2004. Genes and speciation. *Nat. Rev. Genet.* 5:114–122.

691 Wu, C. I. 2001. The genic view of the process of speciation. *J. Evol. Biol.* 14:851–865.

692 Yan, W., A. H. Assadi, A. Wynshaw-Boris, G. Eichele, M. M. Matzuk, and G. D. Clark. 2003.

693 Previously uncharacterized roles of platelet-activating factor acetylhydrolase 1b complex in  
694 mouse spermatogenesis. *Proc. Natl. Acad. Sci. U. S. A.* 100:7189–94.

695 Zamani, N., P. Russell, H. Lantz, M. P. Hoepfner, J. R. Meadows, N. Vijay, E. Mauceli, F. Di

696 Palma, K. Lindblad-Toh, P. Jern, and M. G. Grabherr. 2013. Unsupervised genome-wide  
697 recognition of local relationship patterns. *BMC Genomics* 14:347.

698

699

700

701

702

703

704

705

706

707

708

709

710

711

712  
713  
714  
715  
716  
717  
718  
719

**Table 1.** Genome-wide  $f_4$  statistics supporting differential introgression within Barombi Mbo radiation. Tests with significant evidence for differential introgression are highlighted in bold. The  $f_4$  statistic was calculated for pairwise combinations among sister species of Barombi Mbo subclades and riverine populations of *S. galilaeus* from Mungo and Meme Rivers (MM) and Cross River (CR).

| <b>Introgression with riverine outgroups:<br/>(A,B) &lt;-&gt; ( MM, CR)</b> | <b><math>f_4</math> statistic</b>                    | <b>Z-score</b> | <b>P-value</b>             |
|-----------------------------------------------------------------------------|------------------------------------------------------|----------------|----------------------------|
| <i>S. mariae</i> , <i>S. mongo</i>                                          | -2.04x10 <sup>-7</sup> ± -5.15x10 <sup>-7</sup>      | -0.39          | 0.69                       |
| <b><i>S. mariae</i>, <i>S. pindu</i></b>                                    | <b>-1.92x10<sup>-6</sup> ± -4.48x10<sup>-7</sup></b> | <b>-4.29</b>   | <b>1.8x10<sup>-5</sup></b> |
| <b><i>S. mongo</i>, <i>S. pindu</i></b>                                     | <b>-1.59x10<sup>-6</sup> ± -4.98x10<sup>-7</sup></b> | <b>-3.19</b>   | <b>0.0014</b>              |
| <b><i>K. dikume</i>, <i>K. eisentrauti</i></b>                              | <b>-2.4x10<sup>-6</sup> ± -6 x10<sup>-7</sup></b>    | <b>-4.01</b>   | <b>6.3x10<sup>-5</sup></b> |
| <i>K. eisentrauti</i> , <i>P. maclareni</i>                                 | -2.12x10 <sup>-7</sup> ± -6.15x10 <sup>-7</sup>      | 0.35           | 0.73                       |
| <b><i>K. dikume</i>, <i>P. maclareni</i></b>                                | <b>-2.56x10<sup>-6</sup> ± -5.86x10<sup>-7</sup></b> | <b>-4.37</b>   | <b>1.2x10<sup>-5</sup></b> |
| <i>M. myaka</i> , <i>S. linnelli</i>                                        | -4.04x10 <sup>-7</sup> ± -7.11x10 <sup>-7</sup>      | 0.56           | 0.57                       |

720  
721  
722  
723  
724  
725  
726  
727  
728  
729



730 **Table 2.** Candidate introgressed regions in Barombi Mbo cichlid radiation. These regions feature  
 731 significant  $f_d$  values between riverine populations of *S. galilaeus* (MM: Mungo and Meme River;  
 732 CR: Cross River) and the three subclades of the radiation focused on in this study. Directionality  
 733 was determined from  $f_d$  outlier values (above 98<sup>th</sup> percentile) that overlapped with significant  $f_d$   
 734 peaks. Unannotated regions, regions with no GO terms, and regions that were not  $f_d$  outliers are  
 735 marked with (-). Regions introgressed into a single species within a subclade are highlighted in  
 736 bold.

| Linkage Group               | Gene regions                        | GO Terms                                                                            | Direction ( $f_d$ )                                                                                           |
|-----------------------------|-------------------------------------|-------------------------------------------------------------------------------------|---------------------------------------------------------------------------------------------------------------|
| <b><i>Stomatepia</i></b>    |                                     |                                                                                     |                                                                                                               |
| LG2                         | <i>sirpb1</i>                       | intracellular signal transduction, extracellular exosome                            | -                                                                                                             |
| <b>LG3</b>                  | <b>NA</b>                           | -                                                                                   | <b><i>S. galilaeus</i> MM &lt;-&gt; <i>S. pindu</i></b>                                                       |
| LG3                         | uncharacterized protein-coding gene | -                                                                                   | <i>S. galilaeus</i> MM <-> <i>S. mongo, mariae</i>                                                            |
| <b>LG4</b>                  | <b><i>jmjd8; prss1</i></b>          | <b>extracellular exosome; proteolysis,peptidase activity</b>                        | <b><i>S. galileaus</i> CR &lt;-&gt; <i>S. mariae</i></b>                                                      |
| LG7†                        | NA                                  | -                                                                                   | <i>S. galileaus</i> CR <-> <i>S. pindu, mariae</i> ;<br><i>S. galilaeus</i> MM <-> <i>S. mongo</i>            |
| LG14                        | <i>cldn4</i>                        | plasma membrane; bicellular tight membrane                                          | <i>S. galilaeus</i> MM <-> <i>S. mariae</i>                                                                   |
| <b>LG18</b>                 | <b><i>muc19</i></b>                 | <b>hematopoietic progenitor cell differentiation; extracellular exosome</b>         | <b><i>S. galilaeus</i> MM &lt;-&gt; <i>S. mariae</i></b>                                                      |
| LG20†                       | <i>tprxl; plod3</i>                 | pseudogene of <i>tprxl</i> ;motor nueron axon guidance, nueral crest cell migration | <i>S. galileaus</i> CR <-> <i>S. pindu, mariae</i> ;<br><i>S. galilaeus</i> MM<-> <i>S. mongo</i>             |
| LG20                        | <i>samdh1</i>                       | dGTPASe, immune system process, brain hemorrhages                                   | -                                                                                                             |
| NT_168079.1†                | <i>osbp15;ptprj</i>                 | lipid transport ; artery morphogenesis, phosphatase activity                        | <i>S. galileaus</i> CR<-> <i>S. pindu,mariae</i> ;<br><i>S. galilaeus</i> MM<-> <i>S. mongo</i>               |
| <b><i>Konia + Pungu</i></b> |                                     |                                                                                     |                                                                                                               |
| LG2                         | <i>sirpb1</i>                       | intracellular signal transduction                                                   | -                                                                                                             |
| LG4                         | <i>anapc2</i>                       | ubiquitin dependent catabolic process                                               | <i>S. galilaeus</i> MM <-> <i>P. maclareni, K. dikume</i>                                                     |
| LG6†                        | <i>cd209e</i>                       | endocytosis,mannose binding                                                         | <i>S. galileaus</i> CR<-> <i>K. eisentrauti, P. maclareni</i> ;<br><i>S. galilaeus</i> MM<-> <i>K. dikume</i> |
| <b>LG15</b>                 | <b><i>adgrf4</i></b>                | <b>g-protien coupled receptor activity, signal transduction</b>                     | <b><i>S. galilaeus</i> MM&lt;-&gt; <i>K. dikume</i></b>                                                       |

|                                   |                                                 |                                                                                                                       |                                                                                                                                    |
|-----------------------------------|-------------------------------------------------|-----------------------------------------------------------------------------------------------------------------------|------------------------------------------------------------------------------------------------------------------------------------|
| LG20†                             | <i>klhdc8b</i>                                  | ubiquitin-protein transferase activity, cytoplasm                                                                     | <i>S. galilaeus</i> CR<-> <i>P. maclareni</i> ;<br><i>S. galilaeus</i> MM<-> <i>K. dikume</i> ,<br><i>eisentrauti</i>              |
| LG20                              | NA                                              | -                                                                                                                     | <i>S. galilaeus</i> MM <-> <i>K. dikume</i> ,<br><i>eisentrauti</i>                                                                |
| LG20                              | <i>tprxl</i> ;<br><i>plod3</i> ; <i>clec10a</i> | pseudogene of <i>tprxl</i> ; motor neuron axon guidance, neural crest cell migration ; immune system response         | -                                                                                                                                  |
| LG22                              | <i>ehmt2</i>                                    | neurogenesis, camera-type eye photoreceptor cell differentiation                                                      | -                                                                                                                                  |
| <b>LG23</b>                       | <b><i>ddn1</i></b>                              | <b>serine-type endopeptidase activity,proteolysis</b>                                                                 | <b><i>S. galilaeus</i> MM&lt;-&gt; <i>P. maclareni</i></b><br><i>S. galilaeus</i> CR<-> <i>K. dikume</i> ,<br><i>eisentrauti</i> ; |
| NT_167508.1†                      | <i>fam159a</i>                                  | integral component of membrane                                                                                        | <i>S. galilaeus</i> MM<-> <i>P. maclareni</i>                                                                                      |
| NT_167623.1                       | <i>mepce</i>                                    | methyltransferase activity                                                                                            | <i>S. galilaeus</i> MM<-> <i>K. dikume</i> ,<br><i>eisentrauti</i>                                                                 |
| NT_167637.1                       | NA                                              | -                                                                                                                     | <b><i>S. galilaeus</i> MM&lt;-&gt; <i>K. dikume</i></b>                                                                            |
| NT_167671.1                       | NA                                              | -                                                                                                                     | <b><i>S. galilaeus</i> CR&lt;-&gt; <i>K. dikume</i></b>                                                                            |
| NT_167702.1*                      | <i>pafah1b3</i> ;<br><i>hmcn1</i>               | <b>platelet-activating factor acetyltransferase activity,brain development;fin morphogenesis, calcium ion binding</b> | <b><i>S. galilaeus</i> CR&lt;-&gt; <i>K. eisentrauti</i></b>                                                                       |
| NT_168003.1                       | <i>p2ry14</i>                                   | respiratory abnormal muscle physiology, g-protein coupled purinergic nucleotide receptor activity                     | -                                                                                                                                  |
| <b><i>Myaka + S. linnelli</i></b> |                                                 |                                                                                                                       |                                                                                                                                    |
| LG6†                              | <i>c3</i>                                       | complement activation, inflammatory response                                                                          | <i>S. galilaeus</i> MM<-> <i>S. linnelli</i> ;<br><i>S. galilaeus</i> CR<-> <i>M.myaka</i>                                         |
| LG8/LG24†                         | NA                                              | -                                                                                                                     | <i>S. galilaeus</i> CR<-> <i>S. linnelli</i> ;<br><i>S. galilaeus</i> MM<-> <i>M.myaka</i>                                         |
| LG11†                             | <i>hfe2</i> ; <i>txnip</i>                      | somite development, BMP signaling pathway; enzyme inhibitor activity                                                  | <i>S. galilaeus</i> MM<-> <i>S. linnelli</i> ;<br><i>S. galilaeus</i> CR<-> <i>M.myaka</i>                                         |
| LG11                              | <i>vmo1</i>                                     | extracellular exosome                                                                                                 | <i>S. galilaeus</i> MM<-> <i>M.myaka</i>                                                                                           |
| <b>LG16/LG21</b>                  | <b><i>parp4</i></b>                             | <b>ribosyltransferase activity</b>                                                                                    | <b><i>S. galilaeus</i> CR&lt;-&gt;<i>S. linnelli</i></b>                                                                           |
| LG19†                             | NA                                              | -                                                                                                                     | <i>S. galilaeus</i> CR<-> <i>S. linnelli</i> ;<br><i>S. galilaeus</i> MM<-> <i>M.myaka</i>                                         |
| <b>LG20</b>                       | <b><i>tprxl</i>,<i>plod3</i></b>                | <b>pseudogene of tetra-peptide repeat homeobox ; motor neuron axon guidance, neural crest cell migration</b>          | <b><i>S. galilaeus</i> MM&lt;-&gt; <i>M.myaka</i></b>                                                                              |
| LG20†                             | <i>klhdc8b</i> ; <i>cd163ll</i>                 | ubiquitin-protein transferase activity, cytoplasm; receptor mediated endocytosis, scavenger receptor activity         | <i>S. galilaeus</i> CR<-> <i>S. linnelli</i> ;<br><i>S. galilaeus</i> MM<-> <i>M.myaka</i>                                         |
| NT_167617.1†                      | <i>ssr1</i>                                     | endoplasmic reticulum membrane; cotranslational protein targeting                                                     | <i>S. galilaeus</i> CR<-> <i>S. linnelli</i> ;<br><i>S. galilaeus</i> MM<-> <i>M.myaka</i>                                         |
| NT_168092.1                       | NA                                              | -                                                                                                                     | <b><i>S. galilaeus</i> MM&lt;-&gt; <i>M.myaka</i></b>                                                                              |
| NT_168092.1                       | <i>itgam</i>                                    | integrin mediated signalling pathway, cell adhesion                                                                   | -                                                                                                                                  |

737 \*best candidate region for secondary gene flow contributing to diversification † regions with signatures of

738 differential sorting of polymorphism from putative hybrid swarm

739

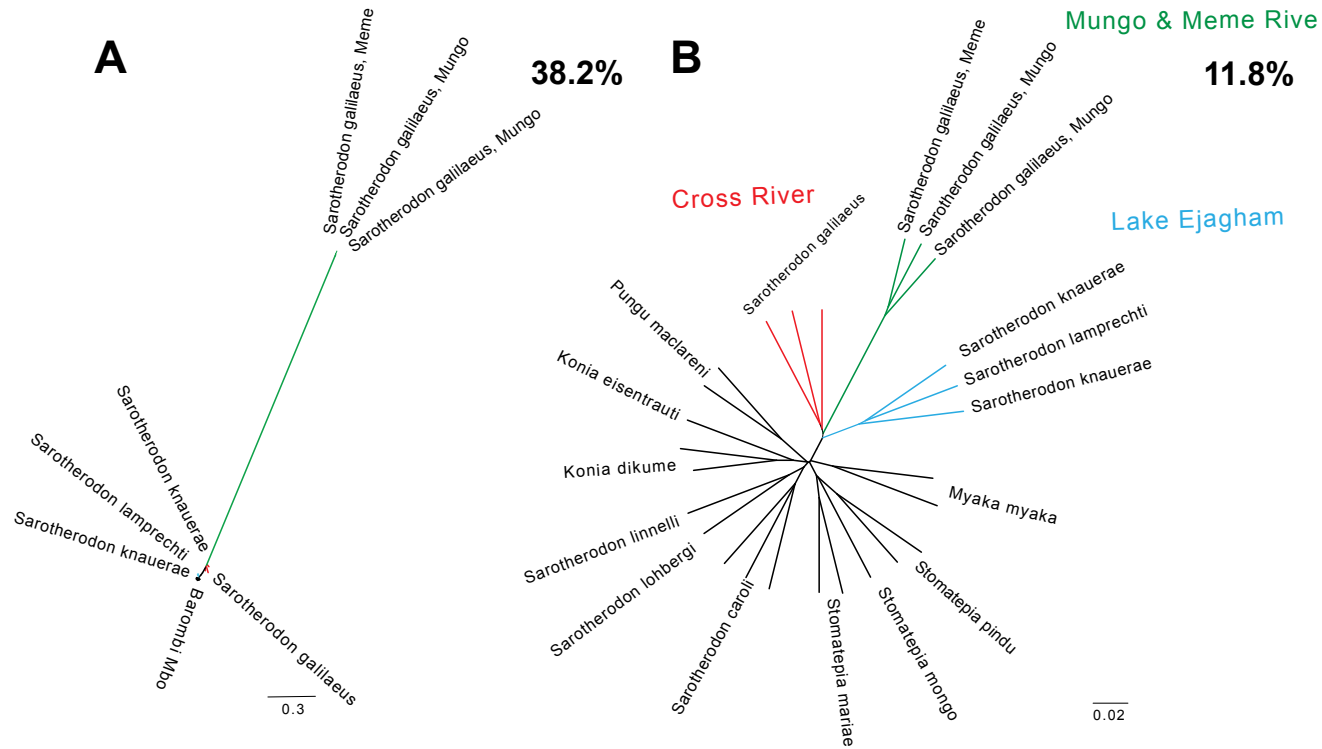

740

741

742

743 Fig 1. The most common topologies feature a monophyletic Barombi Mbo radiation.

744 Across 96.2% of the genome Barombi Mbo species (black) are more closely related to each other

745 than riverine outgroup populations of *S. galilaeus* Mungo and Meme River (green) and *S.*

746 *galilaeus* Cross River (red), or the Lake Ejagham *Sarotherodon* radiation (blue).

747

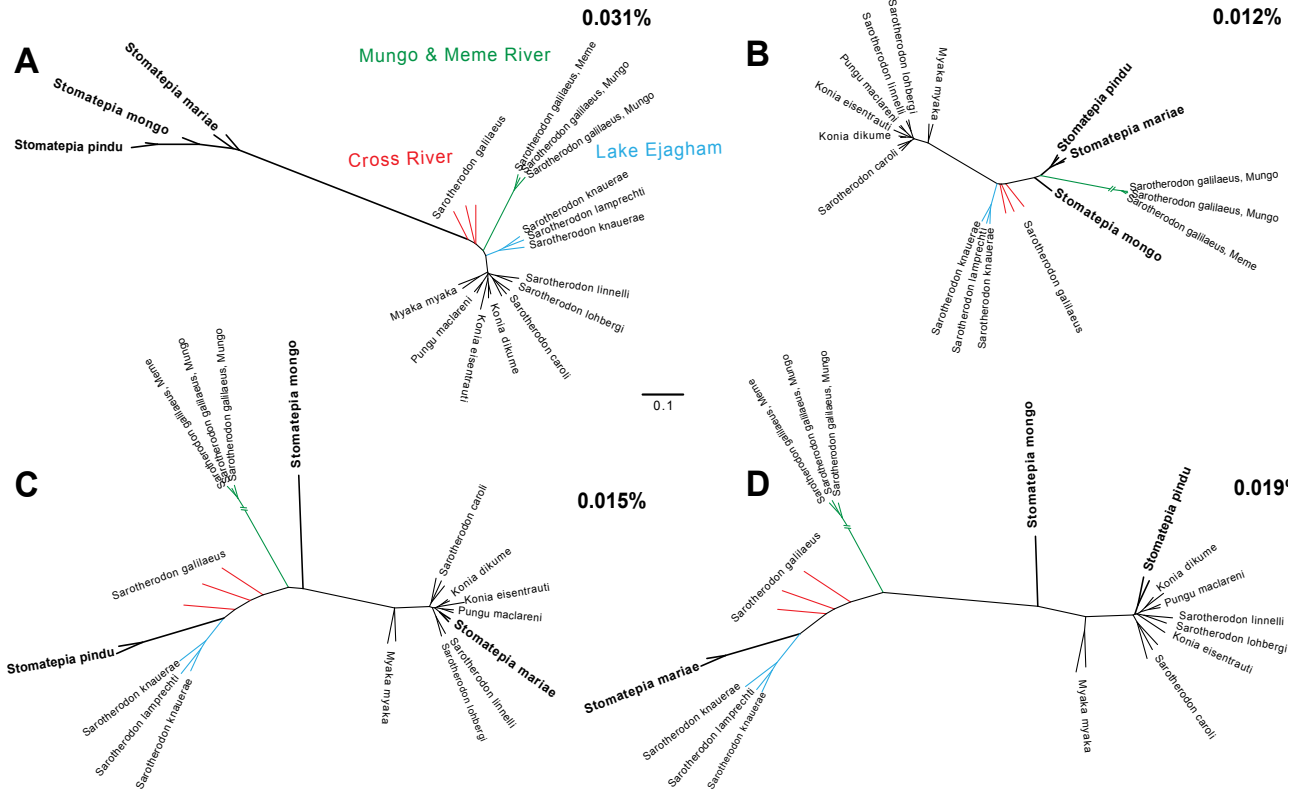

748

749

750

751

752

753

Fig 2. Topologies featuring Barombi Mbo polyphyly with riverine populations involving the *Stomatepia* three-species complex. Across small and independent proportions of the genome A-B) the entire *Stomatepia* clade, C) only *S. pindu*, and D) only *S. mariae* are more closely related to outgroups than other Barombi Mbo species.



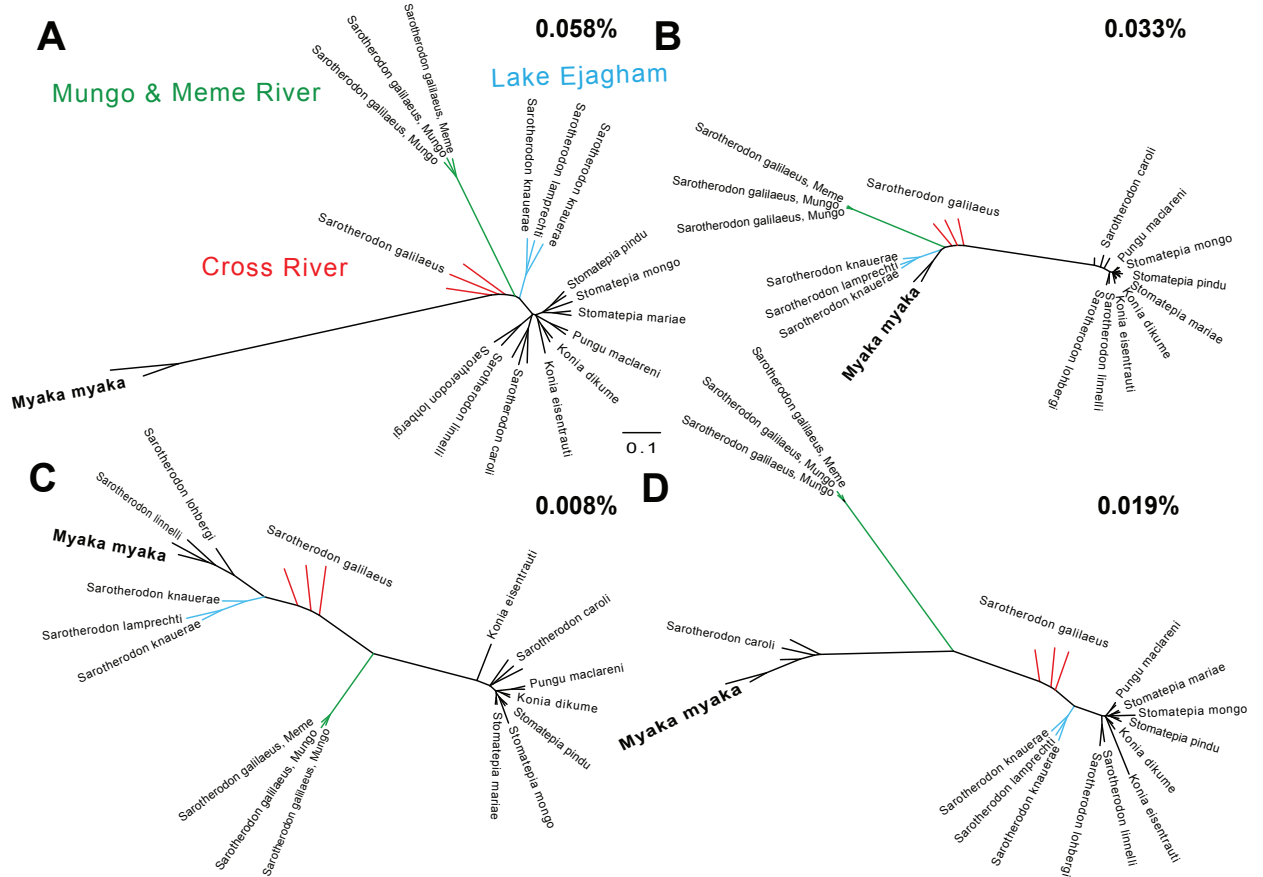

759

760

761 Fig 4. Topologies featuring Barombi Mbo polyphyly with riverine populations involving

762 the *Myaka* + *Sarotherodon* subclade. Across small and independent proportions of the genome

763 A-B) only *M. myaka*, C) *M. myaka* and two Barombi Mbo *Sarotherodon* species (*S. linelli* and *S.*

764 *lohbergi*), and D) *M. myaka* and *S. caroli* are more closely related to outgroups than other

765 Barombi Mbo species.

766

767

768

769

770

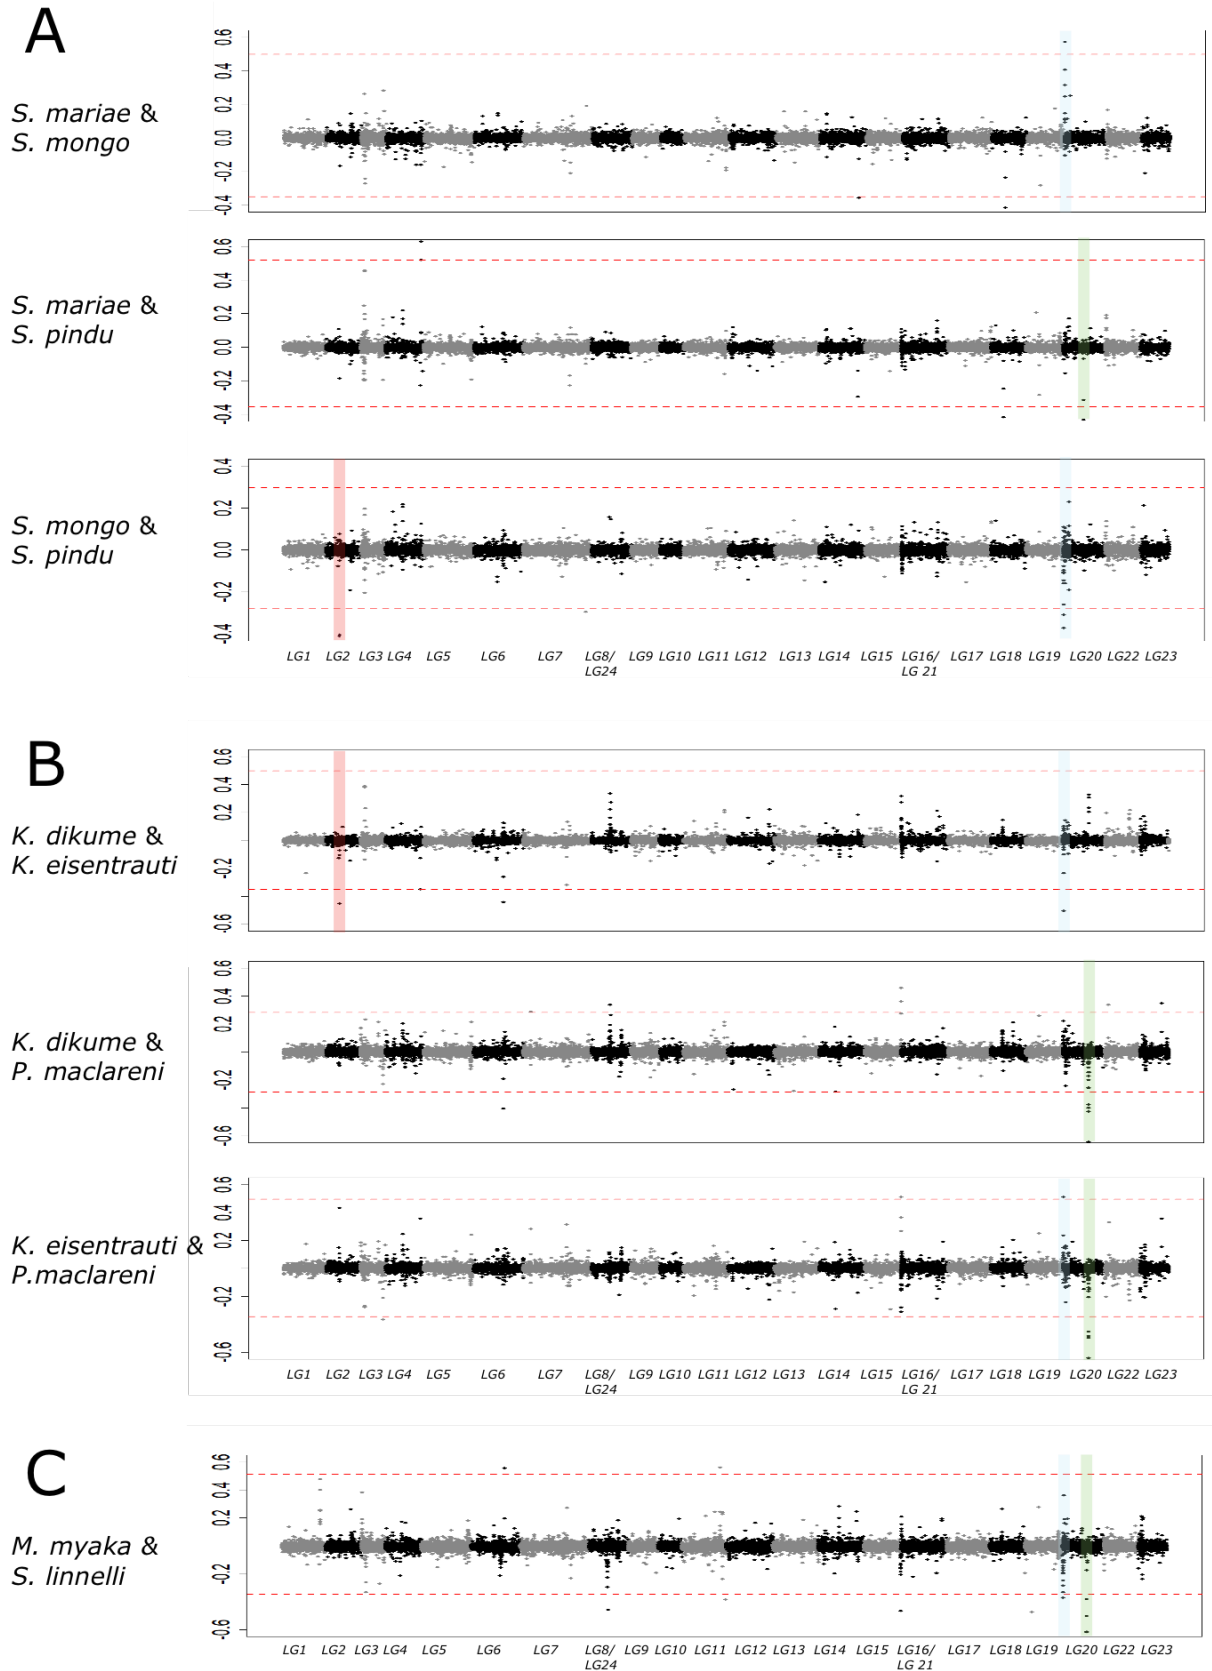

772           Figure 5. Manhattan plots of  $f_4$  values between riverine populations of *S. galilaeus* from  
773 Mungo and Meme river and *S. galileaus* from Cross River and A) combinations of the three  
774 species of *Stomatepia*, B) combinations of the three species in the *Konia+Pungu* subclade, and  
775 C) *M. myaka* and a representative from its sister *Sarotherodon* clade: *S. linnelli*. Alternating  
776 gray/black colors indicate different linkage groups. Dotted red lines mark the permutation-based  
777 significance thresholds for each test ( $P = 0.02$ ). Peaks highlighted in colors represent those  
778 signals of introgression shared across different subclades. Manhattan plots for the scaffolds not  
779 assigned to the 24 linkage groups are presented in Fig S2-4.



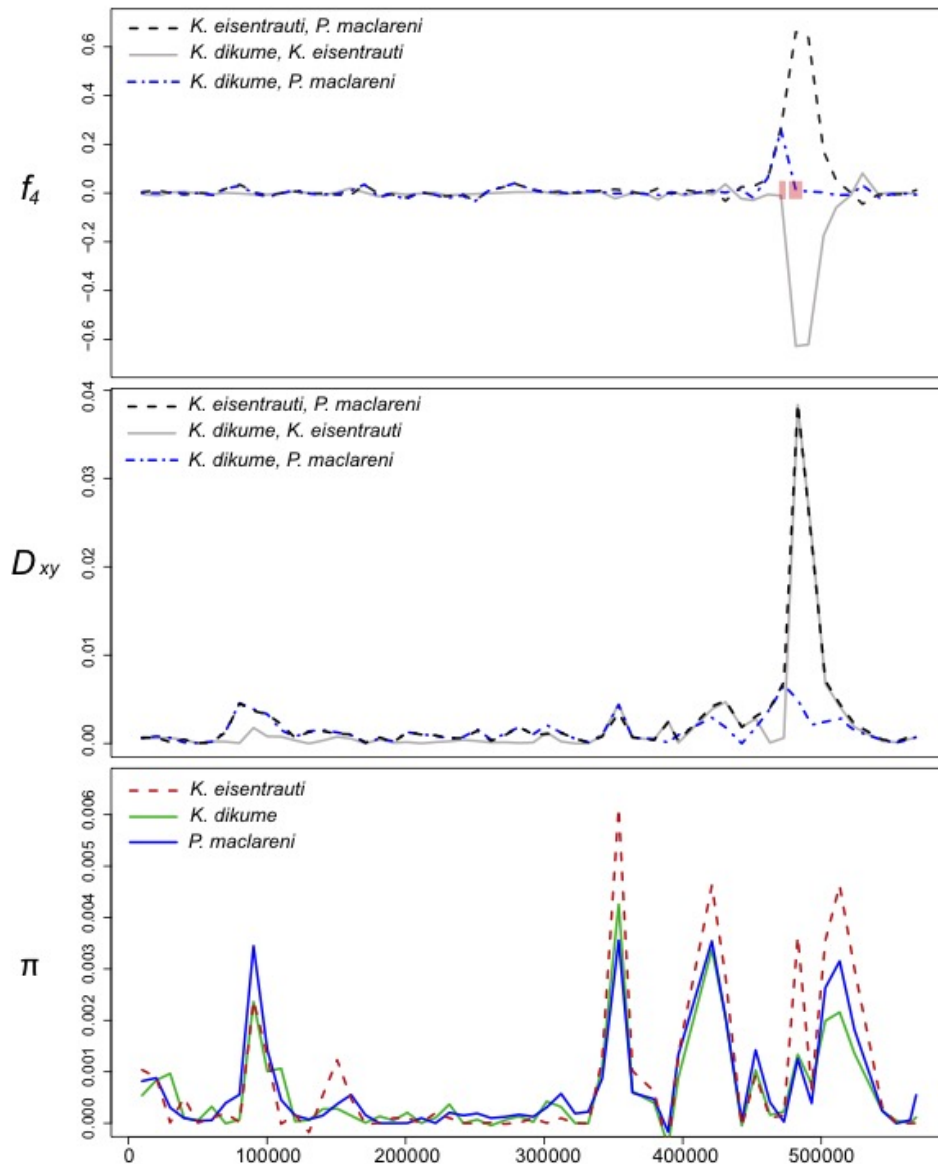

780

781 Figure 6. Candidate introgression region in the *Konia + Pungu* subclade of Barombi Mbo

782 region containing genes *pafah1b3* and *hmcn1*. Row 1 shows the peak signal of introgression

783 across scaffold NT\_167702.1 detected from the  $f_4$  statistic across the three test combinations

784 involving the three species in the *Konia + Pungu* subclade and riverine populations of *S.*

785 *galilaeus* from Mungo, Meme River, and Cross River in non-overlapping 10-kb windows. The

786 two genes in this peak are shown in red (*pafah1b3* on the left and *hmcn1* on the right). Row 2  
787 shows between-population divergence ( $D_{xy}$ ) among the three combinations of sister species in the  
788 subclade calculated in non-overlapping 10-kb windows. Row 3 shows within-population  
789 diversity ( $\pi$ ) in the same non-overlapping 10-kb windows.

790

791

792

793

## Best candidate for sympatric speciation

## Best candidate for allopatric phase

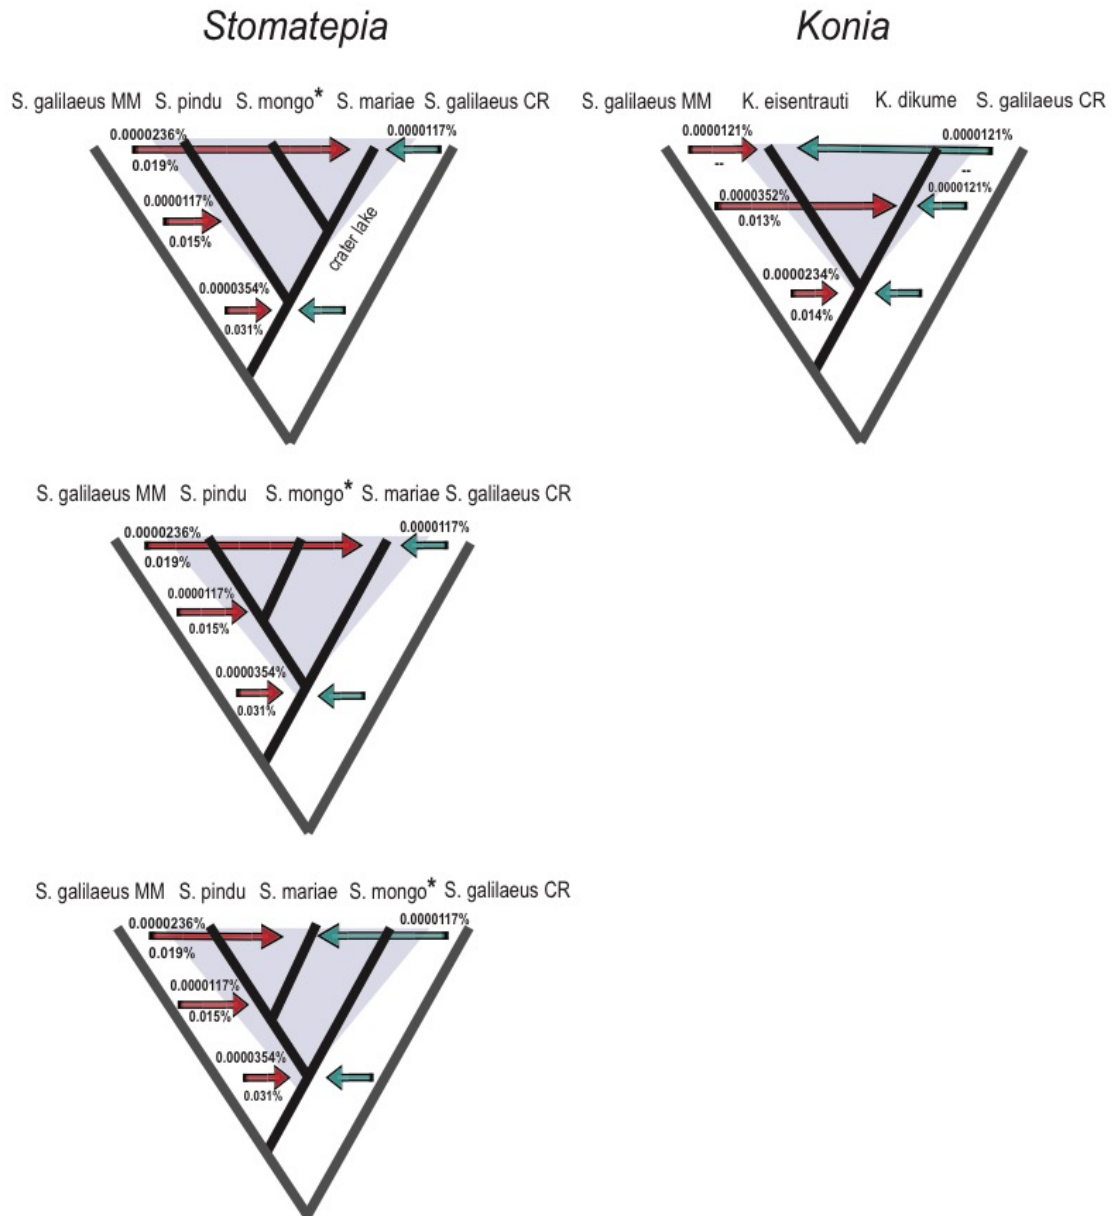

794

795

796

797

Figure 7. The contributions of differential and shared introgressed variation to the genomes of sister species in the genera *Stomatepia* and *Konia*. The left and right columns represent the best candidate sister species in the radiation for sympatric speciation and speciation

798 with secondary gene flow respectively. Species with no evidence for differential introgression  
799 are highlighted with an asterick (\*). The true sister species in the *Stomatepia* are unknown, so all  
800 three potential relationships among the complex are shown. Outgroup riverine *S. galilaeus*  
801 lineages from Mungo/Meme Rivers (MM) and Cross River (CR) are shown with gray branches.  
802 The percentage of introgression consistent with secondary gene flow into single species and a  
803 hybrid swarm from sliding window  $f_4$  statistic tests is show by above arrows. Proportion of  
804 genome from two riverine sources (red: Mungo/Meme River; blue: Cross River) estimated by  
805 SAGUARO is shown below arrows. Introgression patterns not found in the SAGUARO analysis  
806 are represented with dashes (--). Blue arrows with no information that are aligned with red  
807 arrows represent patterns found consistent with hybrid swarm. Note that the separation of arrows  
808 along a branch is for the purpose of clarity and doesn't represent known differences in the timing  
809 of introgression.  
810
